# Supplementary material for: Understanding the mechanism of high viscosity food delaying gastric emptying
Source: Royal Society of Chemistry journal article supplement (doi:10.1039/d4fo00319e), 2024-01-01
Supplement: d4fo00319e1.pdf [file d4fo00319e1.pdf]

## Supplementary Materials

Figure Supplementary 1.

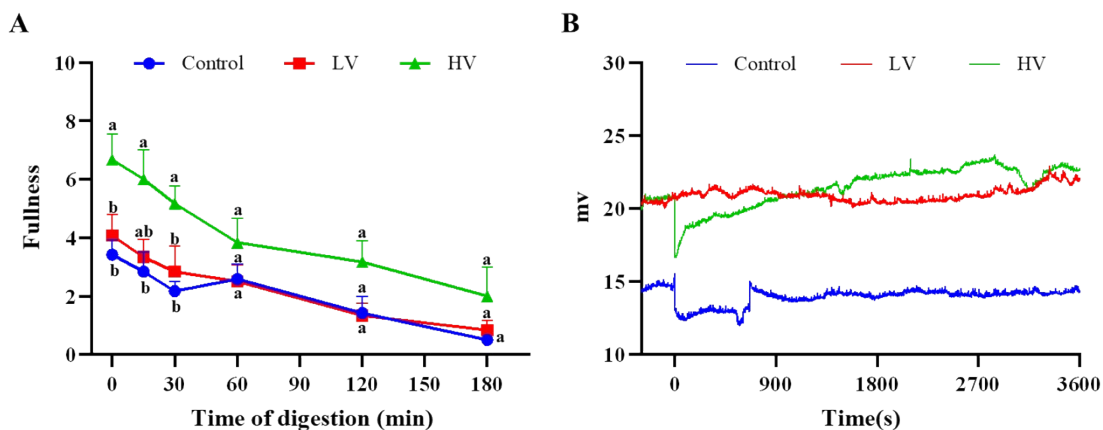

**Figure Supplementary 1.** Effects of peanut butter viscosity on gastric emptying and gastric electrical activity in humans. A: Fullness score. Means of  $n=3$  independent experiments are shown with error bars corresponding to the SEM. B: Gastric motion waveform of one volunteer. Control was the peanut butter without guar gum addition, and HV and LV were the high viscous and low viscous peanut butter groups, respectively. a, b, c indicated significant differences in different viscosity groups,  $p < 0.05$ .

## Figure Supplementary 2.

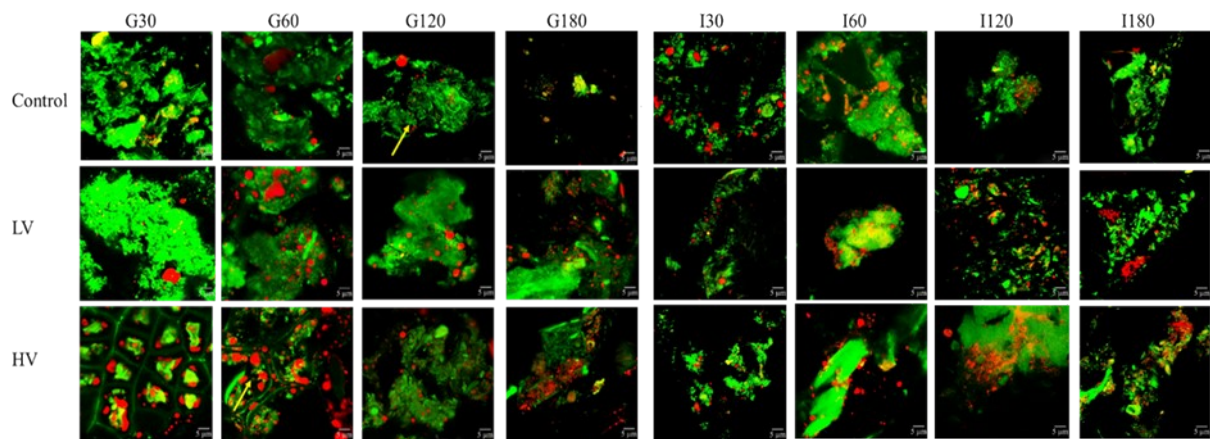

**Figure Supplementary Figure 2.** Effect of peanut butter with different viscosity on microstructure of chyme in mice. The scale bar in all images is 5  $\mu\text{m}$ . Control was the peanut butter without guar gum addition, and HV and LV were high viscous and low viscous peanut butter groups, respectively.

**Table Supplementary 1.**

**Table Supplementary 1.** Composition and viscosity of peanut butters used for test meal. Control was the peanut butter without guar gum addition, and HV and LV were the high viscous and low viscous peanut butter groups, respectively. Means of n=3 independent experiments are shown with error bars corresponding to the SEM. a, b, c indicated significant differences in different viscosity groups,  $p < 0.05$ .

| <b>Composition (/100 g)</b> | <b>Control</b>           | <b>LV</b>                 | <b>HV</b>                  |
|-----------------------------|--------------------------|---------------------------|----------------------------|
| <b>Water/g</b>              | 79.38±3.40               | 79.38±3.40                | 79.38±3.40                 |
| <b>Fat/g</b>                | 10.96±0.72               | 10.96±0.72                | 10.96±0.72                 |
| <b>Protein/g</b>            | 5.40±0.03                | 5.40±0.03                 | 5.40±0.03                  |
| <b>Guar gum/g</b>           | 0.00                     | 0.32                      | 0.80                       |
| <b>Carbohydrate/g</b>       | 3.37±0.06                | 3.37±0.06                 | 3.37±0.06                  |
| <b>Energy/Kcal</b>          | 135.52                   | 135.52                    | 135.52                     |
| <b>Viscosity/mPa.s</b>      | 612.8±381.8 <sup>b</sup> | 1213.7±507.7 <sup>b</sup> | 5315.2±1729.5 <sup>a</sup> |

## Participants informed consent forms

### 知情同意书

#### 试验目的:

为研究花生酱的营养消化情况，需要监测空腹及饮用花生酱后的胃窦面积变化、饱腹变化。

#### 招募标准:

- (1) BMI20-21.5 kg/m<sup>2</sup>;
- (2) 年龄在 22-25 岁;
- (3) 无胃肠道疾病，消化功能良好;
- (4) 无长期药物治疗和药物滥用史。实验开始前 2 天参与者不能服用任何影响胃肠道功能的药物，并且在实验前 8 h 被要求禁食。

#### 测试流程:

- (一) 参与者被要求在 15 分钟内饮用完毕 150 mL 花生酱，在规定时间内平躺于实验床上接受超声检查。检查者使用便携式二维超声仪检查受试者胃部。
- (二) 要求受试者在进食前及进食后 0 min、15 min、30 min、60 min、120 min、180 min 时根据自身感觉在一张十等分的 100 mm 的表格中对饱腹感进行打分。

#### 安全性:

本实验采用无创性超声仪检查胃部，及感官打分方式评价饱腹感，对人体无害。

#### 保密性:

关于您的姓名以及加入这次试验的情况都会得到保密，您提供的信息和数据仅供内部的研究分析。

#### 志愿者受试声明:

1. 我已经仔细阅读了上述项目研究的详细资料，并理解其性质，了解了项目流程。
2. 我已被邀请回答研究项目的相关问题，而且真实地回答了所有问题。
3. 我知道将由调查工作人员对我进行评估，以确保我是否有资格参加这项研究。
4. 我同意遵守项目要求，一旦发生意外情况或异常症状，我会马上报告。
5. 我明白我没有义务参加这次测试。我知道全部完成测试的酬劳为：200 元人民币，我认同该该酬劳是合理的。我同样明白我随时可以退出研究。
6. 在有保密措施的前提下，我将不行使限制以任何方式使用研究成果的权利。
7. 我会对测试期间的得到的所有信息保密。

我声明我已经被告知本研究的目的、过程、可能的危险和副作用以及潜在的获益和费用。我的所有问题都得到满意的回答。我已经详细阅读了本被试同意书。我下面的签名表明我愿意参加本研究：

邱梓锦 黄乐炜 周子隽 邓雷雨 何继玮

余博海 许贤康 吴埔荣 吴合坤 方子新

张航 张章晟

## 知情同意书

### 试验目的:

为研究花生酱的营养消化情况, 需要监测空腹及饮用花生酱后胃电活动变化。

### 招募标准:

- (1) BMI20-21.5 kg/m<sup>2</sup>;
- (2) 年龄在 22-25 岁;
- (3) 无胃肠道疾病, 消化功能良好;
- (4) 无长期药物治疗和药物滥用史。实验开始前 2 天参与者不能服用任何影响胃肠道功能的药物, 并且在实验前 8 h 被要求禁食。

### 测试流程:

(一)通过多通道信号采集处理系统持续追踪采集参与者空腹和进食后的胃电信号, 参与者胃电信号达到平稳后采集空腹时的胃电信号 30 min, 随后进食并持续采集 1 h。

### 安全性:

本实验采用无创性在皮肤表面粘贴电极片方式测定胃电活动, 对人体无害。

### 保密性:

关于您的姓名以及加入这次试验的情况都会得到保密, 您提供的信息和数据仅供内部的研究分析。

### 志愿者受试声明:

- 1.我已经仔细阅读了上述项目研究的详细资料, 并理解其性质, 了解了项目流程。
- 2.我已被邀请回答研究项目的相关问题, 而且真实地回答了所有问题。
- 3.我知道将由调查工作人员对我进行评估, 以确保我是否有资格参加这项研究。
- 4.我同意遵守项目要求, 一旦发生意外情况或异常症状, 我会马上报告。
- 5.我明白我没有义务参加这次测试。我知道全部完成测试的酬劳为: 200 元人民币, 我认同该酬劳是合理的。我同样明白我随时可以退出研究。
- 6.在有保密措施的前提下, 我将不行使限制以任何方式使用研究成果的权利。
- 7.我会对测试期间的得到的所有信息保密。

我声明我已经被告知本研究的目的、过程、可能的危险和副作用以及潜在的获益和费用。我的所有问题都得到满意的回答。我已经仔细阅读了本被试同意书。我下面的签名表明我愿意参加本研究:

王甘霖

赵国栋

徐朝群

李宇彤

**The electrophoresis images**

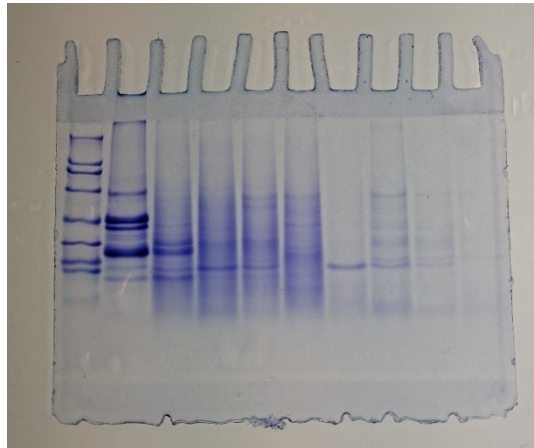

**A:**

**B:**

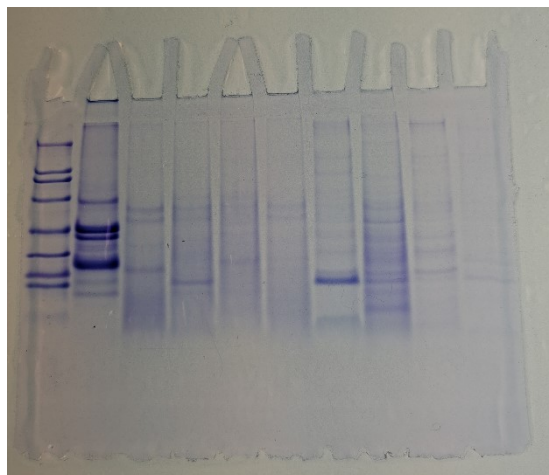

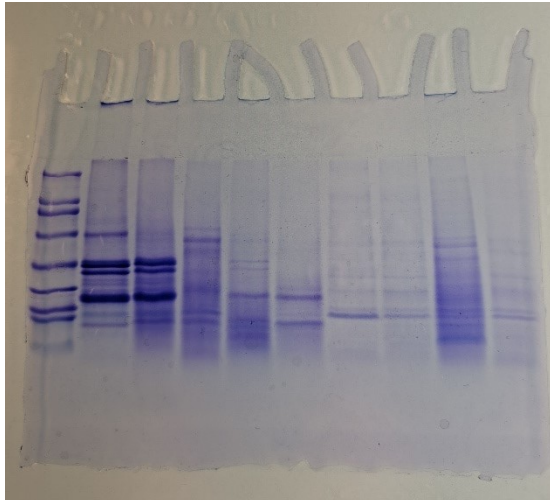

**C:**
